# Supplementary material for: Genome‐wide identification of a novel miRNA‐based signature to predict recurrence in patients with gastric cancer
Source: PubMed Central journal article supplement (PMC6275280; doi:10.1002/1878-0261.12385), 2018-10-10
Supplement: MOL2-12-2072-s001.pdf [file MOL2-12-2072-s001.pdf]

Supplementary Figure 1. Volcano plot showing the differentially expressed miRNAs between gastric tumor and normal tissue samples from the TCGA cohort.

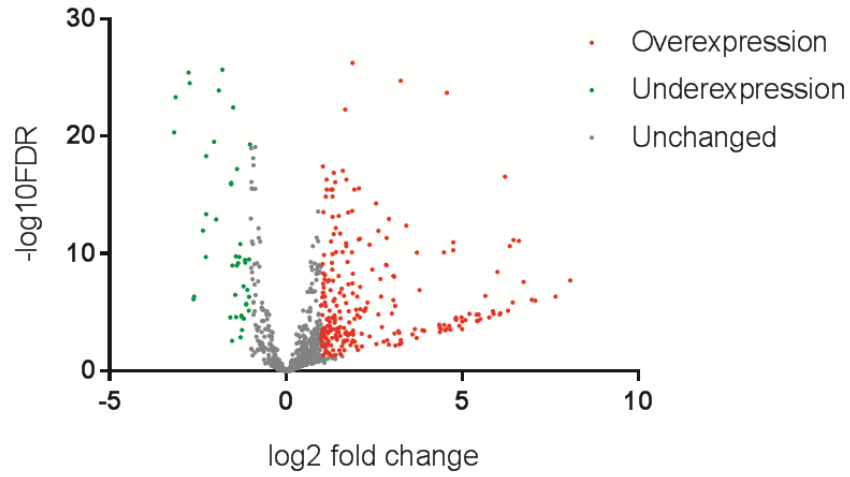

Supplementary Figure 2.

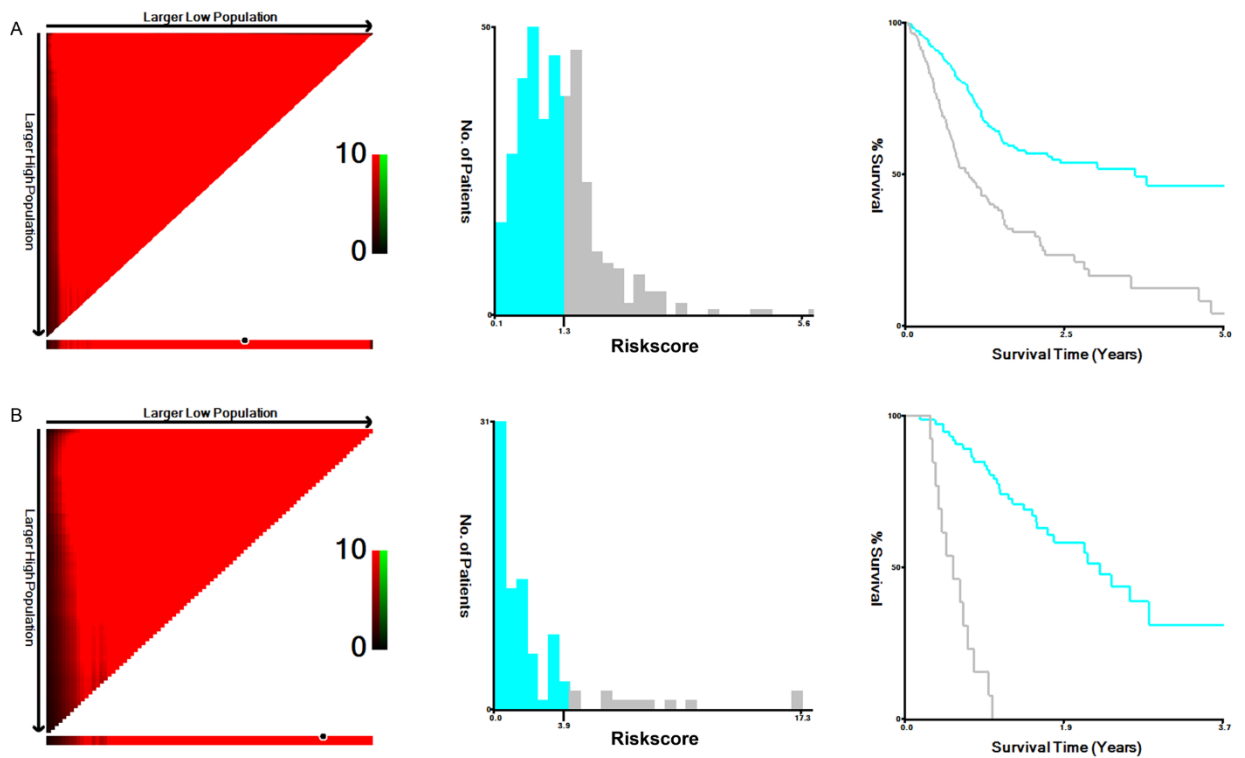

**Supplementary Table 1.** Summary of 312 differentially expressed microRNAs.

| gene           | logFC  | PValue      | FDR         |
|----------------|--------|-------------|-------------|
| hsa-mir-6510   | -4.307 | 2.09E-37    | 5.33E-35    |
| hsa-mir-490    | -3.167 | 1.26E-22    | 4.61E-21    |
| hsa-mir-6507   | -3.127 | 1.07E-25    | 4.53E-24    |
| hsa-mir-133a-2 | -3.010 | 2.48E-35    | 2.99E-33    |
| hsa-mir-133a-1 | -2.976 | 3.93E-35    | 4.14E-33    |
| hsa-mir-1-1    | -2.896 | 2.32E-33    | 1.96E-31    |
| hsa-mir-1-2    | -2.884 | 4.40E-33    | 3.37E-31    |
| hsa-mir-5683   | -2.765 | 6.54E-28    | 3.67E-26    |
| hsa-mir-133b   | -2.732 | 5.75E-27    | 2.85E-25    |
| hsa-mir-205    | -2.618 | 1.65E-07    | 7.64E-07    |
| hsa-mir-6499   | -2.600 | 9.94E-08    | 4.71E-07    |
| hsa-mir-548ba  | -2.353 | 8.29E-14    | 1.06E-12    |
| hsa-mir-944    | -2.270 | 2.28E-11    | 1.96E-10    |
| hsa-mir-885    | -2.262 | 1.64E-20    | 4.93E-19    |
| hsa-mir-383    | -2.259 | 3.00E-15    | 4.44E-14    |
| hsa-mir-145    | -2.237 | 9.73E-37    | 1.37E-34    |
| hsa-mir-139    | -2.106 | 2.17E-49    | 9.16E-47    |
| hsa-mir-551b   | -2.041 | 8.19E-22    | 2.88E-20    |
| hsa-mir-204    | -1.979 | 9.06E-15    | 1.23E-13    |
| hsa-mir-143    | -1.901 | 2.59E-26    | 1.21E-24    |
| hsa-mir-29c    | -1.805 | 3.38E-28    | 2.03E-26    |
| hsa-mir-137    | -1.578 | 8.11E-06    | 2.78E-05    |
| hsa-mir-486-1  | -1.553 | 5.84E-18    | 1.20E-16    |
| hsa-mir-486-2  | -1.551 | 4.31E-18    | 9.09E-17    |
| hsa-mir-802    | -1.525 | 0.001329908 | 0.002761361 |
| hsa-mir-1258   | -1.522 | 1.43E-10    | 1.05E-09    |
| hsa-mir-195    | -1.492 | 8.38E-25    | 3.37E-23    |
| hsa-mir-202    | -1.435 | 6.68E-08    | 3.31E-07    |
| hsa-mir-6720   | -1.420 | 1.93E-11    | 1.68E-10    |
| hsa-mir-378i   | -1.411 | 7.40E-06    | 2.56E-05    |
| hsa-mir-203a   | -1.395 | 1.43E-10    | 1.05E-09    |
| hsa-mir-30a    | -1.388 | 2.36E-19    | 6.21E-18    |
| hsa-mir-365a   | -1.366 | 3.05E-37    | 5.33E-35    |
| hsa-mir-365b   | -1.365 | 3.16E-37    | 5.33E-35    |
| hsa-mir-605    | -1.353 | 8.17E-11    | 6.44E-10    |
| hsa-mir-451a   | -1.323 | 2.30E-11    | 1.96E-10    |
| hsa-mir-149    | -1.294 | 1.53E-12    | 1.54E-11    |
| hsa-mir-4501   | -1.285 | 0.0006351   | 0.00140892  |
| hsa-mir-129-2  | -1.264 | 5.50E-06    | 1.92E-05    |
| hsa-mir-129-1  | -1.257 | 6.99E-06    | 2.42E-05    |
| hsa-mir-187    | -1.249 | 0.000118719 | 0.000316709 |

---

|                 |        |             |             |
|-----------------|--------|-------------|-------------|
| hsa-mir-100     | -1.200 | 1.10E-08    | 6.07E-08    |
| hsa-mir-4732    | -1.192 | 1.05E-05    | 3.49E-05    |
| hsa-mir-218-2   | -1.160 | 4.23E-11    | 3.53E-10    |
| hsa-mir-218-1   | -1.157 | 6.98E-11    | 5.66E-10    |
| hsa-mir-504     | -1.131 | 5.05E-07    | 2.15E-06    |
| hsa-let-7c      | -1.118 | 4.59E-07    | 1.97E-06    |
| hsa-mir-144     | -1.092 | 2.29E-08    | 1.22E-07    |
| hsa-mir-153-1   | -1.054 | 1.85E-06    | 7.28E-06    |
| hsa-mir-378d-2  | -1.045 | 1.01E-07    | 4.74E-07    |
| hsa-mir-6511b-2 | -1.045 | 3.58E-11    | 3.02E-10    |
| hsa-mir-28      | -1.019 | 1.41E-21    | 4.75E-20    |
| hsa-mir-3942    | 1.004  | 0.000759049 | 0.001657715 |
| hsa-mir-3194    | 1.008  | 0.000341938 | 0.000803161 |
| hsa-mir-141     | 1.016  | 5.88E-07    | 2.49E-06    |
| hsa-mir-203b    | 1.024  | 0.000396434 | 0.000918116 |
| hsa-mir-200c    | 1.026  | 1.12E-07    | 5.26E-07    |
| hsa-mir-548s    | 1.026  | 0.000210915 | 0.000519887 |
| hsa-mir-6805    | 1.029  | 0.00438711  | 0.007987762 |
| hsa-mir-4640    | 1.034  | 0.001615035 | 0.003280661 |
| hsa-mir-362     | 1.038  | 9.77E-11    | 7.56E-10    |
| hsa-mir-95      | 1.039  | 4.89E-06    | 1.73E-05    |
| hsa-mir-106b    | 1.044  | 1.33E-19    | 3.63E-18    |
| hsa-mir-3652    | 1.044  | 0.000138552 | 0.000360492 |
| hsa-mir-34c     | 1.047  | 4.39E-08    | 2.21E-07    |
| hsa-mir-3691    | 1.049  | 0.000831899 | 0.00180745  |
| hsa-mir-550a-2  | 1.054  | 6.66E-09    | 3.74E-08    |
| hsa-mir-4660    | 1.054  | 0.000299878 | 0.000712104 |
| hsa-mir-3144    | 1.059  | 0.029260734 | 0.044930416 |
| hsa-mir-532     | 1.060  | 1.85E-15    | 2.84E-14    |
| hsa-mir-320b-1  | 1.061  | 4.41E-08    | 2.21E-07    |
| hsa-mir-130b    | 1.062  | 7.55E-10    | 4.93E-09    |
| hsa-mir-320b-2  | 1.067  | 1.41E-08    | 7.65E-08    |
| hsa-mir-3177    | 1.073  | 0.003587419 | 0.006646581 |
| hsa-mir-6777    | 1.075  | 0.003402985 | 0.006346718 |
| hsa-mir-4726    | 1.076  | 0.002673458 | 0.005169095 |
| hsa-mir-548o    | 1.077  | 7.65E-05    | 0.000218571 |
| hsa-mir-3117    | 1.080  | 0.000191566 | 0.000480625 |
| hsa-mir-500b    | 1.083  | 1.47E-11    | 1.29E-10    |
| hsa-mir-559     | 1.092  | 0.000565461 | 0.001277972 |
| hsa-mir-3934    | 1.098  | 2.53E-09    | 1.54E-08    |
| hsa-mir-4766    | 1.101  | 0.000104696 | 0.000283791 |
| hsa-mir-3677    | 1.101  | 9.86E-08    | 4.71E-07    |
| hsa-mir-421     | 1.104  | 9.99E-10    | 6.33E-09    |
| hsa-mir-5580    | 1.105  | 0.005496048 | 0.009795282 |

---

---

|                |       |             |             |
|----------------|-------|-------------|-------------|
| hsa-mir-4797   | 1.105 | 0.000105379 | 0.000284725 |
| hsa-mir-5703   | 1.106 | 0.000166871 | 0.000423711 |
| hsa-mir-223    | 1.108 | 3.36E-07    | 1.48E-06    |
| hsa-mir-588    | 1.113 | 0.015996973 | 0.025784796 |
| hsa-mir-7112   | 1.123 | 0.000570506 | 0.001285927 |
| hsa-mir-3682   | 1.130 | 6.90E-07    | 2.86E-06    |
| hsa-mir-1307   | 1.130 | 8.52E-17    | 1.41E-15    |
| hsa-mir-940    | 1.130 | 3.70E-07    | 1.61E-06    |
| hsa-mir-4793   | 1.139 | 0.010453871 | 0.017450719 |
| hsa-mir-4677   | 1.152 | 1.97E-17    | 3.39E-16    |
| hsa-mir-181a-1 | 1.156 | 2.07E-18    | 4.85E-17    |
| hsa-mir-5582   | 1.160 | 0.00095966  | 0.002074341 |
| hsa-mir-6850   | 1.161 | 0.017409177 | 0.027795334 |
| hsa-mir-6728   | 1.163 | 0.003711484 | 0.006846349 |
| hsa-mir-7854   | 1.166 | 1.25E-05    | 4.03E-05    |
| hsa-mir-3680-1 | 1.174 | 0.000197458 | 0.000490624 |
| hsa-mir-1229   | 1.177 | 4.86E-05    | 0.000144443 |
| hsa-mir-5586   | 1.179 | 5.14E-09    | 2.95E-08    |
| hsa-mir-3145   | 1.181 | 0.002367561 | 0.004609362 |
| hsa-mir-200b   | 1.186 | 3.91E-09    | 2.27E-08    |
| hsa-mir-548k   | 1.187 | 0.000254496 | 0.000618271 |
| hsa-mir-4645   | 1.194 | 1.25E-05    | 4.03E-05    |
| hsa-mir-3200   | 1.203 | 9.23E-06    | 3.07E-05    |
| hsa-mir-6718   | 1.204 | 0.0014949   | 0.003081175 |
| hsa-mir-4431   | 1.213 | 0.017730541 | 0.028254907 |
| hsa-mir-643    | 1.222 | 3.09E-09    | 1.85E-08    |
| hsa-mir-4461   | 1.235 | 4.87E-05    | 0.000144443 |
| hsa-mir-3684   | 1.236 | 2.06E-05    | 6.38E-05    |
| hsa-mir-548v   | 1.241 | 1.80E-06    | 7.15E-06    |
| hsa-mir-216a   | 1.242 | 0.000153395 | 0.000391855 |
| hsa-mir-3196   | 1.243 | 0.026031608 | 0.040488275 |
| hsa-mir-194-1  | 1.263 | 2.41E-08    | 1.27E-07    |
| hsa-mir-4479   | 1.263 | 9.56E-05    | 0.000266867 |
| hsa-mir-492    | 1.269 | 0.031895356 | 0.048621673 |
| hsa-mir-181b-1 | 1.275 | 1.93E-17    | 3.39E-16    |
| hsa-mir-7844   | 1.280 | 0.00014534  | 0.000374684 |
| hsa-mir-6844   | 1.281 | 0.003450564 | 0.006421249 |
| hsa-mir-550a-1 | 1.283 | 8.38E-13    | 8.94E-12    |
| hsa-mir-708    | 1.304 | 7.43E-11    | 5.97E-10    |
| hsa-mir-200a   | 1.312 | 3.32E-10    | 2.29E-09    |
| hsa-mir-3150b  | 1.313 | 0.000684759 | 0.001507185 |
| hsa-mir-210    | 1.313 | 8.42E-06    | 2.84E-05    |
| hsa-mir-181b-2 | 1.319 | 8.14E-17    | 1.37E-15    |
| hsa-mir-1301   | 1.319 | 5.22E-15    | 7.46E-14    |

---

---

|                |       |             |             |
|----------------|-------|-------------|-------------|
| hsa-mir-3619   | 1.320 | 9.74E-05    | 0.000269156 |
| hsa-mir-93     | 1.320 | 1.87E-17    | 3.35E-16    |
| hsa-mir-503    | 1.324 | 1.23E-11    | 1.09E-10    |
| hsa-mir-194-2  | 1.334 | 3.45E-09    | 2.04E-08    |
| hsa-mir-3660   | 1.336 | 0.01060955  | 0.017640731 |
| hsa-mir-7-2    | 1.347 | 2.47E-07    | 1.11E-06    |
| hsa-mir-500a   | 1.351 | 5.34E-19    | 1.32E-17    |
| hsa-mir-3127   | 1.355 | 1.77E-13    | 2.16E-12    |
| hsa-mir-618    | 1.375 | 2.51E-05    | 7.69E-05    |
| hsa-mir-3174   | 1.376 | 8.72E-06    | 2.92E-05    |
| hsa-mir-4326   | 1.380 | 1.56E-07    | 7.24E-07    |
| hsa-mir-5698   | 1.383 | 5.11E-06    | 1.79E-05    |
| hsa-mir-3689b  | 1.385 | 0.029550791 | 0.045211102 |
| hsa-mir-7702   | 1.389 | 1.58E-05    | 5.01E-05    |
| hsa-mir-17     | 1.393 | 3.86E-18    | 8.34E-17    |
| hsa-mir-3689a  | 1.403 | 0.028994827 | 0.044603356 |
| hsa-mir-3618   | 1.410 | 0.000354788 | 0.000828495 |
| hsa-mir-20a    | 1.411 | 4.93E-14    | 6.49E-13    |
| hsa-mir-5092   | 1.411 | 0.00010129  | 0.000277232 |
| hsa-mir-4746   | 1.418 | 7.78E-12    | 7.24E-11    |
| hsa-mir-4684   | 1.422 | 0.000620349 | 0.001379825 |
| hsa-mir-1254-1 | 1.438 | 6.64E-07    | 2.78E-06    |
| hsa-mir-548d-2 | 1.440 | 0.000136653 | 0.00035776  |
| hsa-mir-3131   | 1.450 | 0.001042266 | 0.002230027 |
| hsa-mir-548d-1 | 1.476 | 8.14E-05    | 0.000231035 |
| hsa-mir-188    | 1.492 | 4.29E-15    | 6.23E-14    |
| hsa-mir-4741   | 1.493 | 0.000198864 | 0.000491621 |
| hsa-mir-1292   | 1.496 | 1.28E-09    | 8.03E-09    |
| hsa-mir-548x   | 1.511 | 0.010732323 | 0.017739899 |
| hsa-mir-6783   | 1.522 | 2.35E-06    | 8.90E-06    |
| hsa-mir-7-3    | 1.526 | 4.31E-08    | 2.19E-07    |
| hsa-mir-6821   | 1.535 | 0.000455819 | 0.001047017 |
| hsa-mir-4449   | 1.538 | 6.14E-05    | 0.000179221 |
| hsa-mir-182    | 1.540 | 1.57E-13    | 1.94E-12    |
| hsa-mir-449c   | 1.545 | 0.022725218 | 0.035808147 |
| hsa-mir-3187   | 1.548 | 9.69E-06    | 3.22E-05    |
| hsa-mir-3651   | 1.580 | 1.77E-08    | 9.59E-08    |
| hsa-mir-6744   | 1.586 | 0.004208291 | 0.007695422 |
| hsa-mir-1228   | 1.601 | 7.81E-12    | 7.24E-11    |
| hsa-mir-19a    | 1.617 | 3.41E-19    | 8.71E-18    |
| hsa-mir-1305   | 1.627 | 0.001813868 | 0.003632045 |
| hsa-mir-1910   | 1.639 | 0.001278622 | 0.002668016 |
| hsa-mir-4523   | 1.645 | 7.74E-05    | 0.000220446 |
| hsa-mir-3944   | 1.648 | 7.86E-08    | 3.85E-07    |

---

---

|                |       |             |             |
|----------------|-------|-------------|-------------|
| hsa-mir-3689e  | 1.654 | 0.010432754 | 0.017450022 |
| hsa-mir-216b   | 1.675 | 0.001278173 | 0.002668016 |
| hsa-mir-6715b  | 1.678 | 0.000270581 | 0.00065358  |
| hsa-mir-501    | 1.681 | 1.31E-24    | 5.03E-23    |
| hsa-mir-584    | 1.701 | 1.28E-12    | 1.32E-11    |
| hsa-mir-3690-1 | 1.703 | 3.81E-07    | 1.65E-06    |
| hsa-mir-7705   | 1.709 | 2.40E-12    | 2.32E-11    |
| hsa-mir-335    | 1.710 | 2.20E-18    | 5.01E-17    |
| hsa-mir-4517   | 1.715 | 0.000192497 | 0.000481529 |
| hsa-mir-662    | 1.736 | 0.001142275 | 0.002413379 |
| hsa-mir-1304   | 1.738 | 3.96E-07    | 1.70E-06    |
| hsa-mir-6854   | 1.747 | 6.40E-11    | 5.24E-10    |
| hsa-mir-4691   | 1.754 | 0.000391815 | 0.000909918 |
| hsa-mir-96     | 1.765 | 1.99E-15    | 2.99E-14    |
| hsa-mir-217    | 1.774 | 7.37E-09    | 4.12E-08    |
| hsa-mir-2115   | 1.781 | 2.14E-06    | 8.22E-06    |
| hsa-mir-4525   | 1.800 | 2.40E-05    | 7.38E-05    |
| hsa-mir-548az  | 1.811 | 0.00028029  | 0.000675098 |
| hsa-mir-506    | 1.831 | 0.003201259 | 0.005983729 |
| hsa-mir-301b   | 1.867 | 8.28E-12    | 7.58E-11    |
| hsa-mir-614    | 1.873 | 0.0002876   | 0.00068877  |
| hsa-mir-877    | 1.878 | 1.42E-15    | 2.26E-14    |
| hsa-mir-3937   | 1.882 | 0.00173421  | 0.003489114 |
| hsa-mir-146b   | 1.886 | 8.28E-29    | 5.37E-27    |
| hsa-mir-1246   | 1.886 | 0.000215953 | 0.000530753 |
| hsa-mir-1254-2 | 1.890 | 6.10E-09    | 3.47E-08    |
| hsa-mir-4777   | 1.892 | 8.18E-10    | 5.27E-09    |
| hsa-mir-3176   | 1.895 | 4.92E-08    | 2.46E-07    |
| hsa-mir-622    | 1.900 | 0.001200159 | 0.002516751 |
| hsa-mir-3654   | 1.901 | 0.000144446 | 0.000373592 |
| hsa-mir-7641-1 | 1.904 | 0.000344095 | 0.000805755 |
| hsa-mir-183    | 1.939 | 1.85E-17    | 3.35E-16    |
| hsa-mir-211    | 1.943 | 0.00155892  | 0.003189733 |
| hsa-mir-4687   | 1.948 | 1.14E-05    | 3.75E-05    |
| hsa-mir-21     | 1.959 | 1.27E-52    | 1.07E-49    |
| hsa-mir-4745   | 1.984 | 1.51E-06    | 6.12E-06    |
| hsa-mir-3689f  | 1.993 | 0.004397887 | 0.007990126 |
| hsa-mir-551a   | 2.018 | 9.95E-08    | 4.71E-07    |
| hsa-mir-1276   | 2.021 | 4.98E-06    | 1.75E-05    |
| hsa-mir-374c   | 2.041 | 0.009562849 | 0.016155273 |
| hsa-mir-4661   | 2.062 | 5.32E-13    | 6.06E-12    |
| hsa-mir-18a    | 2.069 | 1.36E-17    | 2.73E-16    |
| hsa-mir-592    | 2.096 | 4.84E-13    | 5.58E-12    |
| hsa-mir-4758   | 2.098 | 8.24E-06    | 2.79E-05    |

---

---

|                |       |             |             |
|----------------|-------|-------------|-------------|
| hsa-mir-675    | 2.107 | 1.34E-06    | 5.46E-06    |
| hsa-mir-3189   | 2.107 | 1.25E-08    | 6.86E-08    |
| hsa-mir-3161   | 2.143 | 0.000284743 | 0.000683871 |
| hsa-mir-518d   | 2.157 | 0.004648201 | 0.008372721 |
| hsa-mir-5094   | 2.205 | 1.78E-06    | 7.11E-06    |
| hsa-mir-4713   | 2.229 | 2.02E-06    | 7.90E-06    |
| hsa-mir-4658   | 2.259 | 1.10E-06    | 4.50E-06    |
| hsa-mir-6891   | 2.312 | 3.23E-07    | 1.43E-06    |
| hsa-mir-615    | 2.369 | 1.77E-12    | 1.76E-11    |
| hsa-mir-466    | 2.372 | 0.000514864 | 0.001176234 |
| hsa-mir-7974   | 2.446 | 3.44E-10    | 2.36E-09    |
| hsa-mir-937    | 2.552 | 3.23E-16    | 5.24E-15    |
| hsa-mir-1283-1 | 2.560 | 0.002738305 | 0.005258294 |
| hsa-mir-4664   | 2.620 | 9.08E-14    | 1.14E-12    |
| hsa-mir-514a-3 | 2.621 | 4.24E-06    | 1.54E-05    |
| hsa-mir-4728   | 2.677 | 2.42E-09    | 1.49E-08    |
| hsa-mir-509-1  | 2.696 | 9.34E-08    | 4.53E-07    |
| hsa-mir-449a   | 2.718 | 6.31E-05    | 0.000183332 |
| hsa-mir-519e   | 2.767 | 0.0015435   | 0.003173586 |
| hsa-mir-508    | 2.834 | 1.18E-10    | 8.99E-10    |
| hsa-mir-573    | 2.851 | 1.27E-10    | 9.60E-10    |
| hsa-mir-3662   | 2.856 | 3.93E-13    | 4.61E-12    |
| hsa-mir-3923   | 2.872 | 0.001145748 | 0.002414664 |
| hsa-mir-935    | 2.918 | 8.06E-15    | 1.11E-13    |
| hsa-mir-519d   | 2.919 | 0.003074968 | 0.0057991   |
| hsa-mir-934    | 3.004 | 3.48E-06    | 1.30E-05    |
| hsa-mir-509-3  | 3.043 | 1.30E-09    | 8.12E-09    |
| hsa-mir-514a-1 | 3.049 | 1.99E-07    | 9.14E-07    |
| hsa-mir-509-2  | 3.072 | 1.45E-09    | 8.97E-09    |
| hsa-mir-521-2  | 3.076 | 0.000265428 | 0.000642976 |
| hsa-mir-514a-2 | 3.094 | 6.82E-07    | 2.85E-06    |
| hsa-mir-524    | 3.108 | 0.003665403 | 0.006776173 |
| hsa-mir-1911   | 3.190 | 0.000160088 | 0.000407716 |
| hsa-mir-302c   | 3.215 | 0.000223966 | 0.000545675 |
| hsa-mir-1323   | 3.223 | 0.002810504 | 0.005360304 |
| hsa-mir-517b   | 3.240 | 0.002337776 | 0.00456191  |
| hsa-mir-515-2  | 3.251 | 0.001107184 | 0.002351022 |
| hsa-mir-135b   | 3.255 | 3.54E-27    | 1.86E-25    |
| hsa-mir-517a   | 3.272 | 0.002209912 | 0.004342553 |
| hsa-mir-549a   | 3.414 | 3.09E-14    | 4.13E-13    |
| hsa-mir-515-1  | 3.586 | 0.000319624 | 0.000754741 |
| hsa-mir-122    | 3.657 | 0.000102932 | 0.000280816 |
| hsa-mir-498    | 3.701 | 0.000714857 | 0.001565259 |
| hsa-mir-548f-1 | 3.712 | 9.33E-12    | 8.37E-11    |

---

---

|                |       |             |             |
|----------------|-------|-------------|-------------|
| hsa-mir-184    | 3.790 | 2.37E-08    | 1.26E-07    |
| hsa-mir-516b-2 | 3.874 | 0.000129559 | 0.000341306 |
| hsa-mir-1283-2 | 3.907 | 0.000144473 | 0.000373592 |
| hsa-mir-302d   | 3.924 | 0.000147851 | 0.000378839 |
| hsa-mir-523    | 4.346 | 3.89E-05    | 0.000118433 |
| hsa-mir-519b   | 4.359 | 6.75E-05    | 0.000194943 |
| hsa-mir-520d   | 4.365 | 0.000193945 | 0.000483715 |
| hsa-mir-516b-1 | 4.395 | 9.67E-05    | 0.000268087 |
| hsa-mir-4652   | 4.478 | 8.56E-12    | 7.75E-11    |
| hsa-mir-519c   | 4.490 | 3.93E-05    | 0.000119032 |
| hsa-mir-517c   | 4.509 | 0.000131898 | 0.000346387 |
| hsa-mir-518e   | 4.557 | 0.00010363  | 0.000281807 |
| hsa-mir-196b   | 4.565 | 4.35E-26    | 1.93E-24    |
| hsa-mir-518a-2 | 4.630 | 4.95E-05    | 0.000146398 |
| hsa-mir-525    | 4.660 | 0.000113156 | 0.000303792 |
| hsa-mir-483    | 4.746 | 1.07E-12    | 1.12E-11    |
| hsa-mir-5589   | 4.748 | 5.35E-12    | 5.07E-11    |
| hsa-mir-196a-1 | 4.801 | 1.62E-33    | 1.52E-31    |
| hsa-mir-516a-1 | 4.809 | 1.18E-05    | 3.86E-05    |
| hsa-mir-521-1  | 4.821 | 8.73E-06    | 2.92E-05    |
| hsa-mir-518b   | 4.827 | 1.31E-05    | 4.22E-05    |
| hsa-mir-196a-2 | 4.830 | 1.03E-32    | 7.27E-31    |
| hsa-mir-518c   | 4.916 | 4.73E-05    | 0.000141402 |
| hsa-mir-526b   | 4.982 | 8.20E-06    | 2.79E-05    |
| hsa-mir-520a   | 4.996 | 2.01E-05    | 6.25E-05    |
| hsa-mir-518a-1 | 4.997 | 9.97E-05    | 0.000274715 |
| hsa-mir-520e   | 5.091 | 1.43E-05    | 4.58E-05    |
| hsa-mir-516a-2 | 5.202 | 3.80E-06    | 1.40E-05    |
| hsa-mir-302a   | 5.406 | 4.53E-06    | 1.63E-05    |
| hsa-mir-520g   | 5.420 | 1.70E-05    | 5.35E-05    |
| hsa-mir-527    | 5.436 | 1.80E-05    | 5.63E-05    |
| hsa-mir-302b   | 5.460 | 4.23E-06    | 1.54E-05    |
| hsa-mir-520h   | 5.510 | 1.21E-05    | 3.94E-05    |
| hsa-mir-519a-1 | 5.652 | 8.54E-08    | 4.16E-07    |
| hsa-mir-520b   | 5.762 | 7.95E-06    | 2.74E-05    |
| hsa-mir-512-1  | 5.870 | 2.11E-06    | 8.17E-06    |
| hsa-mir-519a-2 | 5.884 | 3.64E-06    | 1.35E-05    |
| hsa-mir-1269a  | 5.995 | 5.48E-10    | 3.67E-09    |
| hsa-mir-522    | 6.060 | 4.29E-06    | 1.55E-05    |
| hsa-mir-518f   | 6.078 | 3.28E-06    | 1.23E-05    |
| hsa-mir-552    | 6.210 | 1.12E-18    | 2.70E-17    |
| hsa-mir-520c   | 6.294 | 1.81E-06    | 7.15E-06    |
| hsa-mir-105-1  | 6.347 | 2.41E-12    | 2.32E-11    |
| hsa-mir-512-2  | 6.426 | 3.20E-07    | 1.43E-06    |

---



---

|               |       |          |          |
|---------------|-------|----------|----------|
| hsa-mir-105-2 | 6.458 | 6.23E-13 | 7.01E-12 |
| hsa-mir-767   | 6.604 | 7.54E-13 | 8.36E-12 |
| hsa-mir-1269b | 6.738 | 4.39E-09 | 2.53E-08 |
| hsa-mir-520f  | 6.968 | 1.86E-07 | 8.59E-07 |
| hsa-mir-371a  | 7.067 | 2.30E-07 | 1.04E-06 |
| hsa-mir-373   | 7.645 | 9.57E-08 | 4.61E-07 |
| hsa-mir-372   | 8.063 | 3.24E-09 | 1.92E-08 |

---

**Supplementary Table 2.** Identification of the Prognostic miRNAs from the TCGA Cohort.

| Variable       | Univariable analysis |                | Multivariable analysis |                |             |
|----------------|----------------------|----------------|------------------------|----------------|-------------|
|                | HR                   | <i>P</i> value | HR                     | <i>P</i> value | coefficient |
| hsa-mir-708    | 1.216                | 0.002          | 1.139                  | 0.061          | 0.13047     |
| hsa-mir-7-3    | 0.858                | 0.003          | 0.855                  | 0.007          | -0.15620    |
| hsa-mir-378i   | 0.734                | 0.006          | 0.690                  | 0.001          | -0.37045    |
| hsa-mir-4793   | 0.554                | 0.006          | 0.549                  | 0.008          | -0.60046    |
| hsa-mir-7-2    | 0.863                | 0.006          |                        |                |             |
| hsa-mir-100    | 1.120                | 0.006          |                        |                |             |
| hsa-mir-30a    | 1.178                | 0.007          |                        |                |             |
| hsa-mir-137    | 1.154                | 0.011          |                        |                |             |
| hsa-mir-216a   | 1.142                | 0.012          |                        |                |             |
| hsa-mir-6715b  | 0.830                | 0.013          |                        |                |             |
| hsa-mir-96     | 0.876                | 0.016          |                        |                |             |
| hsa-mir-1292   | 0.822                | 0.017          |                        |                |             |
| hsa-mir-500b   | 0.835                | 0.020          |                        |                |             |
| hsa-mir-217    | 1.114                | 0.024          |                        |                |             |
| hsa-mir-3161   | 0.820                | 0.025          |                        |                |             |
| hsa-mir-532    | 0.807                | 0.041          |                        |                |             |
| hsa-mir-466    | 0.762                | 0.042          | 0.792                  | 0.089          | -0.23334    |
| hsa-mir-3144   | 0.785                | 0.042          | 0.774                  | 0.039          | -0.25687    |
| hsa-mir-3923   | 1.161                | 0.046          | 1.294                  | 0.007          | 0.25761     |
| hsa-mir-145    | 1.098                | 0.046          | 0.869                  | 0.035          | -0.14044    |
| hsa-mir-549a   | 0.885                | 0.047          | 0.855                  | 0.019          | -0.15682    |
| hsa-mir-181b-1 | 1.187                | 0.047          | 1.259                  | 0.014          | 0.22993     |
| hsa-mir-365a   | 1.210                | 0.049          | 1.172                  | 0.145          | 0.15853     |
| hsa-mir-365b   | 1.210                | 0.050          |                        |                |             |
